# Supplementary material for: Brazilian Validation of the European Organisation for Research and Treatment of Cancer (EORTC) Quality of Life Group (QLG) Computerised Adaptive Tests (CAT) Core
Source: MDPI journal article supplement (doi:10.3390/curroncol28050291), 2021-08-31
Supplement: s1 [file s1]

# Supplementary Materials: Brazilian Validation of the European Organisation for Research and Treatment of Cancer (EORTC) Quality of Life Group (QLG) Computerised Adaptive Tests (CAT) Core

Gustavo Nader Marta, Tomás Y. T. de Souza, Alice R. N. de Souza e Silva, Ana Paula A. Pereira, David R. Ferreira Neto, Rie N. Asso, Fabiana A. M. Degrande, Guilherme Nader-Marta, Maurício F. da Silva, Rafael Gadia, Samir A. Hanna, Bernhard Holzner, Everardo D. Saad and Morten Aagaard Petersen

**Table S1.** – QLQ-C30 mean scores at T0 in Brazil and the difference between Brazilian and European mean scores.

| Domain | Brazil | Brazil - Europe |
|--------|--------|-----------------|
| AP     | 11.5   | -12.0           |
| CF     | 85.3   | 2.8             |
| CO     | 14.3   | -1.2            |
| DI     | 6.0    | 9.0             |
| DY     | 6.0    | 20.8            |
| EF     | 74.7   | 69.5            |
| FA     | 18.7   | 37.0            |
| FI     | 17.9   | 12.1            |
| NV     | 5.0    | 7.8             |
| PF     | 82.4   | 78.1            |
| PA     | 15.1   | 23.6            |
| RF     | 85.2   | 70.0            |
| SF     | 81.2   | 67.0            |
| SL     | 27.2   | 28.3            |
| QL     | 74.4   | 61.2            |

Note: AP lack of appetite, CO constipation, DI diarrhea, DY dyspnea, FI financial difficulties, SL insomnia, NV nausea/vomiting, PA pain, FA fatigue, CF cognitive functioning, RF role functioning, SF social functioning, EF emotional functioning, PF physical functioning and QL overall quality of life.

**Table S2.** – Mean relative validity/sensitivity (ability to detect cross-sectional differences) of the EORTC CAT Core compared to the QLQ-C30.

| Domain | Brazil | Brazil-Europe | Minimum | Maximum |
|--------|--------|---------------|---------|---------|
| AP     | 1.18   | 0.09          | 0.56    | 1.72    |
| CF     | 1.07   | 0.00          | 0.63    | 1.71    |
| CO     | 1.14   | -0.04         | 0.77    | 1.60    |
| DI     | 1.27   | -0.14         | 0.75    | 1.62    |
| DY     | 4.58   | 3.32          | 0.84    | 36.24   |
| EF     | 1.04   | -0.07         | 0.60    | 1.60    |
| FA     | 1.04   | -0.01         | 0.72    | 1.30    |
| FI     | 1.38   | -0.16         | 0.64    | 4.33    |
| NV     | 1.02   | -0.11         | 0.38    | 1.48    |
| PA     | 1.01   | -0.12         | 0.75    | 1.30    |
| PF     | 0.95   | -0.04         | 0.60    | 1.38    |
| RF     | 1.11   | -0.26         | 0.74    | 1.75    |
| SF     | 1.09   | -0.06         | 0.79    | 1.53    |
| SL     | 1.17   | 0.01          | 0.86    | 1.46    |
| Median | 1.10   | -0.05         | 0.95    | 4.58    |

Note: AP lack of appetite, CO constipation, DI diarrhea, DY dyspnea, FI financial difficulties, SL insomnia, NV nausea/vomiting, PA pain, FA fatigue, CF cognitive functioning, RF role functioning, SF social functioning, EF emotional functioning and PF physical functioning.
